# Supplementary material for: GPR171 expression enhances proliferation and metastasis of lung cancer cells
Source: PubMed Central journal article supplement (PMC4884959; doi:10.18632/oncotarget.6856), 2016-01-09
Supplement: oncotarget-07-7856-s001.pdf [file oncotarget-07-7856-s001.pdf]

SUPPLEMENTARY FIGURES, TABLES

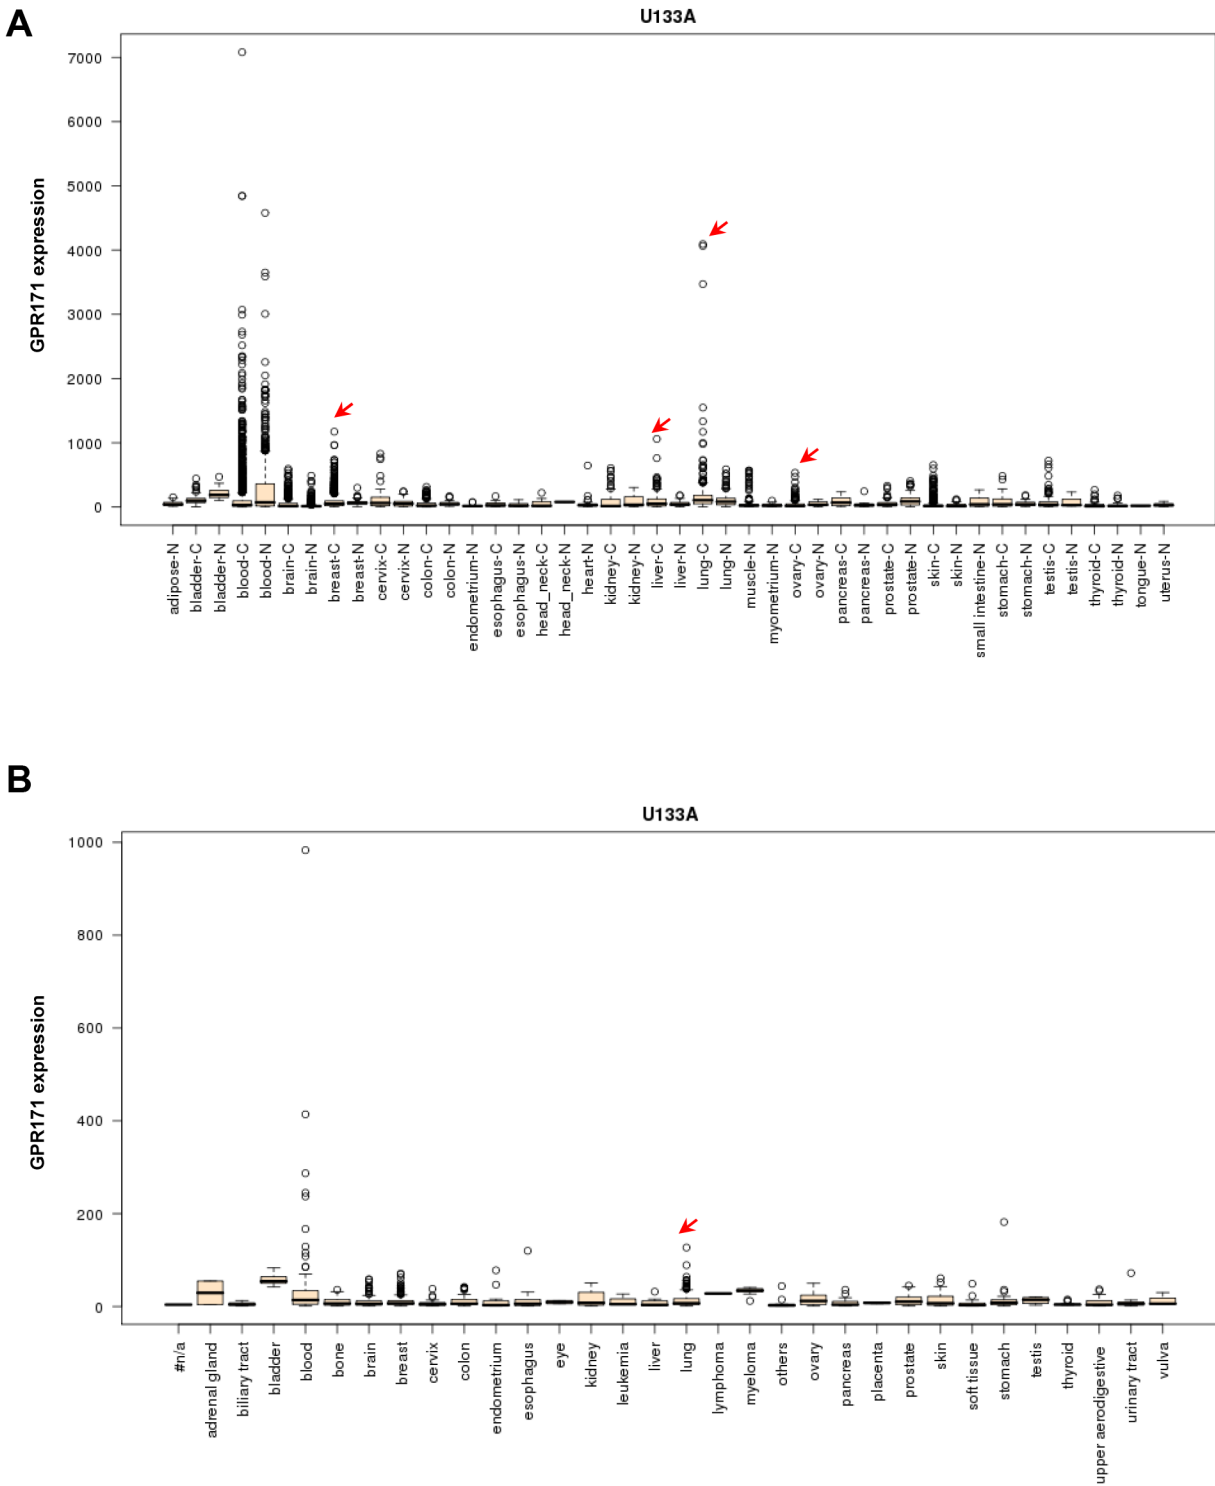

**Supplementary Figure S1: Overexpression of GPR171 in a subset of cancers and cancer cell lines.** A. Overexpression of GPR171 in breast, liver, lung, and ovarian cancers was assessed by web-accessible GENT microarray database (medical-genome.kribb.re.kr/GENT/). N indicates normal and C indicates cancer. Red arrows indicate overexpression in cancer tissues compared with normal tissues. B. Overexpression of GPR171 in a subset of cancer cell lines. Red arrow indicates overexpression in lung cancer cell lines.

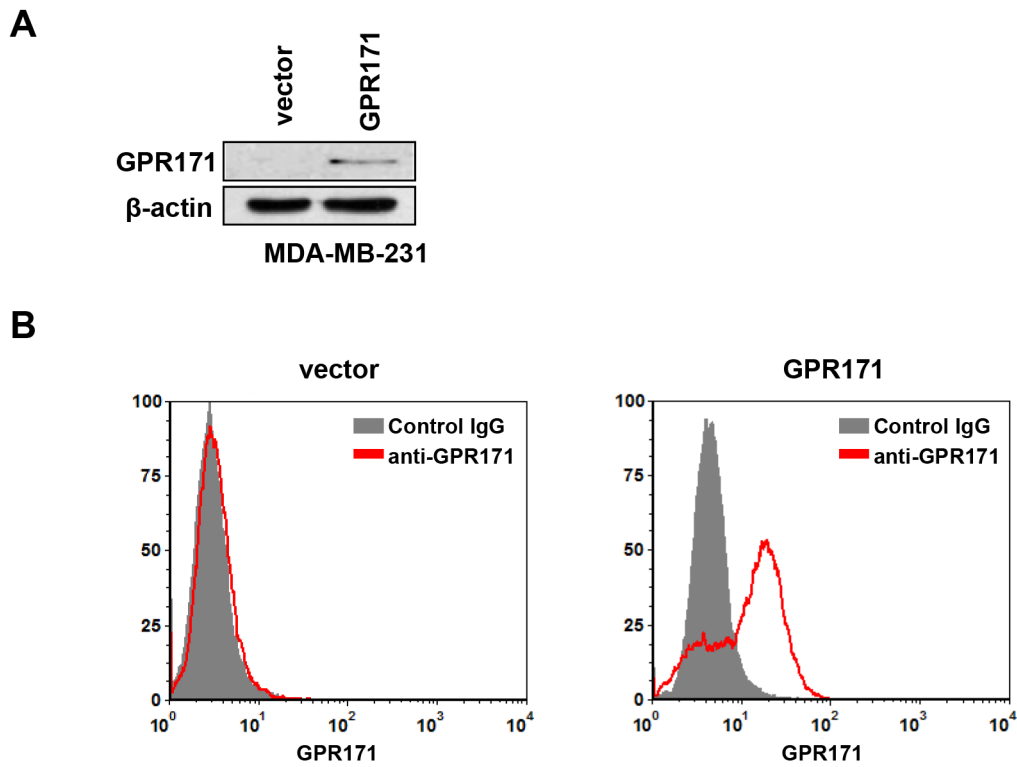

**Supplementary Figure S2: The anti-GPR171 polyclonal antibody is specific to GPR171.** **A.** Immunoblots of GPR171 and  $\beta$ -Actin from GPR171-negative MDA-MB-231 cells with or without ectopic expression of GPR171. Anti-GPR171 antibody (GTX108183; GeneTex) was used for the immunoblotting. **B.** Flow cytometry analysis of MDA-MB-231 cells expressing control vector or GPR171. Anti-GPR171 antibody (ab60843; Abcam) was used for the flow cytometry.

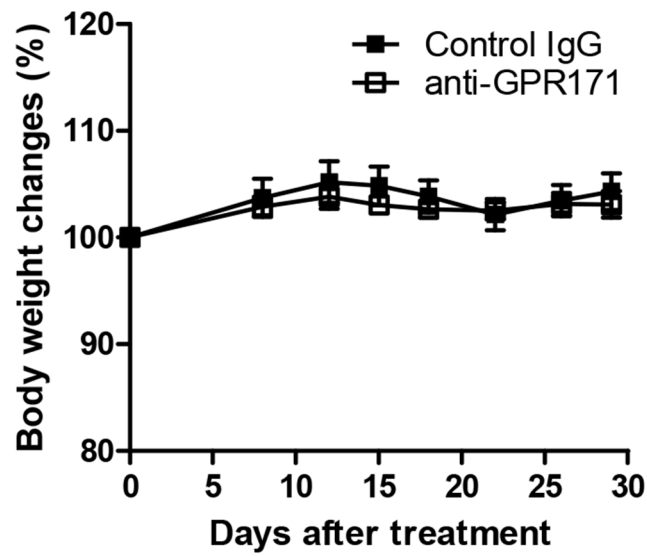

**Supplementary Figure S3: No significant alteration of body weight in anti-GPR171 antibody-treated BALB/c nude mice compared to control IgG-treated mice within a month.** Body weight changes (%) in mice with Calu-6 xenograft tumors were determined after treatment of anti-GPR171 antibody or control IgG. n = 5.

**Supplementary Table S1: GPR171 is upregulated in NSCLC tissues**

| Clinical types of NSCLC      | Number of stained tissues |          |          | Total positive tissues |
|------------------------------|---------------------------|----------|----------|------------------------|
|                              | Strong                    | Moderate | Negative |                        |
| Squamous cell carcinoma      | 1/12                      | 5/12     | 6/12     | 6/12                   |
| Adenocarcinoma               | 1/8                       | 2/8      | 5/8      | 3/8                    |
| Bronchioloalveolar carcinoma | 0/4                       | 3/4      | 1/4      | 3/4                    |
| Adenosquamous carcinoma      | 1/3                       | 1/3      | 1/3      | 2/3                    |
| Large cell carcinoma         | 1/3                       | 1/3      | 1/3      | 2/3                    |
| Mucoepidermoid carcinoma     | 0/4                       | 0/4      | 4/4      | 0/4                    |
| Adenoid cystic carcinoma     | 0/1                       | 0/1      | 1/1      | 0/1                    |

Immunohistochemical quantification of GPR171 in NSCLC tissues. Strong, moderate, and negative indicate >50%, 10-50%, and <10% positive cells, respectively.

**Supplementary Table S2: GPR171 is upregulated in SCLC tissues**

| Clinical types of SCLC                 | Number of stained tissues |          |          | Total positive tissues |
|----------------------------------------|---------------------------|----------|----------|------------------------|
|                                        | Strong                    | Moderate | Negative |                        |
| Small cell carcinoma                   | 1/2                       | 1/2      | 0/2      | 2/2                    |
| Combined small cell and adenocarcinoma | 0/1                       | 0/1      | 1/1      | 0/1                    |

Immunohistochemical quantification of GPR171 in SCLC tissues. Strong, moderate, and negative indicate >50%, 10-50%, and <10% positive cells, respectively.
